# Supplementary material
Source: PubMed Central journal article supplement (PMC5206969)
Supplement: NIHMS834948-supplement-Appendix.pdf [file NIHMS834948-supplement-Appendix.pdf]

Table 1a. *Measures of Child Effortful Control Comprised of Four Subscales: Inhibitory Control, Attention Shift, Attention Focus, and Activation Control*

| Construct                                                                 | # items | $\alpha$ | Sample Item                                                                                                                        |
|---------------------------------------------------------------------------|---------|----------|------------------------------------------------------------------------------------------------------------------------------------|
| Child effortful control, age 3 years ( $N = 285$ ):                       |         |          |                                                                                                                                    |
| Parent report, Children's Behavior Questionnaire (Rothbart, 1989):        |         |          |                                                                                                                                    |
| Inhibitory control (mother report)                                        | 13      | .78      | Within the past 6 months, my child can lower his/her voice when asked to do so.                                                    |
| Inhibitory control (father report)                                        | 13      | .73      | Within the past 6 months, my child will move from one task to another without completing any of them.                              |
| Attention shift (mother report)                                           | 5       | .54      | Within the past 6 months, my child can easily shift from one activity to another.                                                  |
| Attention shift (father report)                                           | 5       | .51      | Within the past 6 months, my child has an easy time leaving play to come to dinner.                                                |
| Attention focus (mother report)                                           | 9       | .68      | Within the past 6 months, my child when picking up toys or other jobs usually keeps at the task until it's done.                   |
| Attention focus (father report)                                           | 9       | .68      | Within the past 6 months, my child has difficulty leaving a project s/he has begun.                                                |
| Child effortful control, age 5 years ( $N = 280$ ):                       |         |          |                                                                                                                                    |
| Parent report, Late Childhood Temperament Questionnaire (Capaldi, 2000b): |         |          |                                                                                                                                    |
| Inhibitory control (mother report)                                        | 10      | .80      | My child can wait before entering into new activities if she is asked to.                                                          |
| Inhibitory control (father report)                                        | 10      | .79      | My child is able to resist laughing or smiling when it isn't appropriate.                                                          |
| Attention focus (mother report)                                           | 9       | .79      | My child when drawing or coloring in a book shows strong concentration.                                                            |
| Attention focus (father report)                                           | 9       | .72      | My child sometimes becomes absorbed in a picture book and looks at it for a long time.                                             |
| Child effortful control, age 7 years ( $N = 247$ ):                       |         |          |                                                                                                                                    |
| Parent report, Late Childhood Temperament Questionnaire (Capaldi, 2000b): |         |          |                                                                                                                                    |
| Inhibitory control (mother report)                                        | 5       | .76      | Thinking of the past 6 months, your son or daughter when you tell him or her to stop doing something, it is easy for them to stop. |
| Inhibitory control (father report)                                        | 5       | .69      | Thinking of the past 6 months, your son or daughter opens presents before he/she is supposed to.                                   |
| Attention (mother report)                                                 | 3       | .71      | The past 6 months, your son or daughter listens carefully when someone tells him/her how to do something.                          |
| Attention (father report)                                                 | 3       | .67      | Thinking of the past 6 months, your son or daughter often forgets what he/she was asked to do.                                     |

|                                                                                               |   |     |                                                                                                                                                                  |
|-----------------------------------------------------------------------------------------------|---|-----|------------------------------------------------------------------------------------------------------------------------------------------------------------------|
| Child report, Late Childhood Temperament Questionnaire (Capaldi, 2000a):                      |   |     |                                                                                                                                                                  |
| Inhibitory control                                                                            | 3 | .58 | Do you say things you shouldn't before you can stop yourself?                                                                                                    |
| Attention                                                                                     | 4 | .48 | Do you often forget what the teacher asked you to do?                                                                                                            |
| <hr/>                                                                                         |   |     |                                                                                                                                                                  |
| Child effortful control, ages 11-12 years ( $N = 176$ ):                                      |   |     |                                                                                                                                                                  |
| Parent report, Late Childhood Temperament Questionnaire (Capaldi, 2000b):                     |   |     |                                                                                                                                                                  |
| Inhibitory control (mother report)                                                            | 5 | .85 | Thinking of the past 6 months, your son or daughter would push ahead of the other kids instead of waiting his or her turn when it is something they really want? |
| Inhibitory control (father report)                                                            | 5 | .74 | Thinking of the past 6 months, your son or daughter opens presents before he/she is supposed to.                                                                 |
| Attention (mother report)                                                                     | 3 | .77 | The past 6 months, your son or daughter listens carefully when someone tells him/her how to do something.                                                        |
| Attention (father report)                                                                     | 3 | .72 | Thinking of the past 6 months, your son or daughter often forgets what he/she was asked to do.                                                                   |
| Activation control (mother report)                                                            | 6 | .85 | Thinking of the past 6 months, your son or daughter sometimes does jobs or chores before you ask.                                                                |
| Activation control (father report)                                                            | 6 | .84 | Thinking of the past 6 months, my child gets started right away when he/she has some hard work or homework to do.                                                |
| Child report, Late Childhood Temperament Questionnaire (Capaldi, 2000a):                      |   |     |                                                                                                                                                                  |
| Inhibitory control                                                                            | 3 | .54 | Do you say things you shouldn't before you can stop yourself?                                                                                                    |
| Attention                                                                                     | 4 | .47 | Does it take a long time to get ready for school in the morning?                                                                                                 |
| <hr/>                                                                                         |   |     |                                                                                                                                                                  |
| Child effortful control, ages 13-14 years ( $N = 147$ ):                                      |   |     |                                                                                                                                                                  |
| Parent report, Early Adolescent Temperament Questionnaire – Revised (Ellis & Rothbart, 1999): |   |     |                                                                                                                                                                  |
| Inhibitory control (mother report)                                                            | 5 | .64 | Thinking of the past 6 months, your son or daughter would push ahead of the other kids instead of waiting his or her turn when it is something they really want? |
| Inhibitory control (father report)                                                            | 5 | .59 | Thinking of the past 6 months, your son or daughter opens presents before he/she is supposed to.                                                                 |
| Attention (mother report)                                                                     | 6 | .80 | The past 6 months, your son or daughter listens carefully when someone tells him/her how to do something.                                                        |
| Attention (father report)                                                                     | 6 | .81 | Thinking of the past 6 months, your son or daughter often forgets what he/she was asked to do.                                                                   |

Child report, Late Childhood Temperament Questionnaire  
(Capaldi, 2000a):

|                    |   |     |                                                                                            |
|--------------------|---|-----|--------------------------------------------------------------------------------------------|
| Inhibitory control | 5 | .57 | It's easy for me to keep a secret.                                                         |
| Attention          | 6 | .63 | I pay close attention when someone tells me how to do something.                           |
| Activation control | 5 | .79 | I do something fun for a while before starting my homework, even when I'm not supposed to. |

---

*Note:* For the sample sizes listed above, availability of mother, father, and child reports ranged from 83.5% to 96.4%, 69.3 to 85.7%, and 85.8% to 97.2% of the cases across assessments, respectively.

Table 2a. *Measures of Mothers' and Fathers' Poor Discipline Comprised of Three Subscales from the Discipline Questionnaire (Capaldi, 1995): Harsh Discipline, Poor Discipline Implementation, and Low Confidence in Discipline*

| Construct                                                     | # items | $\alpha$ | Sample item                                                                                                                                     |
|---------------------------------------------------------------|---------|----------|-------------------------------------------------------------------------------------------------------------------------------------------------|
| Mothers' poor discipline, child age 3 years<br>( $N = 281$ ): |         |          |                                                                                                                                                 |
| Harsh discipline:                                             |         |          |                                                                                                                                                 |
| Self-report                                                   | 6       | .71      | In general, how often do you think the discipline you use with your child is appropriate for his/her age?                                       |
| Partner report                                                | 6       | .67      | How often does your partner spank or swat your child when your child won't mind or breaks a rule?                                               |
| Poor discipline implementation:                               |         |          |                                                                                                                                                 |
| Self-report                                                   | 7       | .45      | If you tell your child s/he will get punished if s/he doesn't stop doing something, and s/he keeps doing it, how often will you punish him/her? |
| Partner report                                                | 7       | .76      | How often does your partner let your child get out of a punishment when s/he sets his/her mind to it?                                           |
| Low confidence in discipline:                                 |         |          |                                                                                                                                                 |
| Self-report                                                   | 5       | .70      | How much of the time do you feel confident that you can change or correct your child's misbehavior?                                             |
| Partner report                                                | 5       | .71      | How often does your partner seem to be having problems managing your child in general?                                                          |
| Fathers' poor discipline, child age 3 years<br>( $N = 250$ ): |         |          |                                                                                                                                                 |
| Harsh discipline:                                             |         |          |                                                                                                                                                 |
| Self-report                                                   | 6       | .69      | How often do you do you scold or yell at child when child won't mind you or breaks a rule?                                                      |
| Partner report                                                | 6       | .79      | How often do you think the discipline your partner uses with your child is fair?                                                                |
| Poor discipline implementation:                               |         |          |                                                                                                                                                 |
| Self-report                                                   | 7       | .60      | How often is it hard to be patient with your child?                                                                                             |
| Partner report                                                | 7       | .67      | When your child won't mind you or breaks a rule, how often does your partner leave it to the other parent?                                      |
| Low confidence in discipline:                                 |         |          |                                                                                                                                                 |
| Self-report                                                   | 5       | .70      | How often do you have to discipline your child repeatedly for the same thing?                                                                   |

|                                                                   |   |     |                                                                                                            |
|-------------------------------------------------------------------|---|-----|------------------------------------------------------------------------------------------------------------|
| Partner report                                                    | 5 | .67 | How often do you think your partner is satisfied?                                                          |
| <hr/>                                                             |   |     |                                                                                                            |
| Mothers' poor discipline, child age 5 years<br>( <i>N</i> = 273): |   |     |                                                                                                            |
| Harsh discipline:                                                 |   |     |                                                                                                            |
| Self-report                                                       | 6 | .69 | How often do you think your discipline is too strict?                                                      |
| Partner report                                                    | 6 | .59 | How often does your partner spank or swat your child when your child won't mind or breaks a rule?          |
| Poor discipline implementation:                                   |   |     |                                                                                                            |
| Self-report                                                       | 7 | .68 | How often do you let your child get out of a punishment when s/he really sets his/her mind to it?          |
| Partner report                                                    | 7 | .69 | How often does your partner get angry when disciplining your child?                                        |
| Low confidence in discipline:                                     |   |     |                                                                                                            |
| Self-report                                                       | 5 | .79 | How much of the time do you feel confident that you can change or correct your child's misbehavior?        |
| Partner report                                                    | 5 | .70 | How often does your partner seem to be having problems managing your child in general?                     |
| <hr/>                                                             |   |     |                                                                                                            |
| Fathers' poor discipline, child age 5 years<br>( <i>N</i> = 249): |   |     |                                                                                                            |
| Harsh discipline:                                                 |   |     |                                                                                                            |
| Self-report                                                       | 6 | .66 | How often do you do you scold or yell at child when child won't mind you or breaks a rule?                 |
| Partner report                                                    | 6 | .80 | How often do you think the discipline your partner uses with your child is harsh or mean?                  |
| Poor discipline implementation:                                   |   |     |                                                                                                            |
| Self-report                                                       | 7 | .58 | How often do you think that the kind of punishment you give your child depends on your mood?               |
| Partner-report                                                    | 7 | .63 | When your child won't mind you or breaks a rule, how often does your partner leave it to the other parent? |
| Low confidence in discipline:                                     |   |     |                                                                                                            |
| Self-report                                                       | 5 | .63 | How often when you discipline your child, does s/he ignore the punishment?                                 |
| Partner report                                                    | 5 | .76 | How often do you think your partner is satisfied?                                                          |
| <hr/>                                                             |   |     |                                                                                                            |

|                                                                     |   |     |                                                                                                            |
|---------------------------------------------------------------------|---|-----|------------------------------------------------------------------------------------------------------------|
| Mothers' poor discipline, child age 7 years<br>( <i>N</i> = 240):   |   |     |                                                                                                            |
| Harsh discipline:                                                   |   |     |                                                                                                            |
| Self-report                                                         | 6 | .72 | How often do you think your discipline is too strict?                                                      |
| Partner report                                                      | 6 | .62 | How often does your partner spank or swat your child when your child won't mind or breaks a rule?          |
| Poor discipline implementation:                                     |   |     |                                                                                                            |
| Self-report                                                         | 7 | .75 | How often do you let your child get out of a punishment when s/he really sets his/her mind to it?          |
| Partner-report                                                      | 7 | .74 | How often does your partner get angry when disciplining your child?                                        |
| Low confidence in discipline:                                       |   |     |                                                                                                            |
| Self-report                                                         | 5 | .77 | How much of the time do you feel confident that you can change or correct your child's misbehavior?        |
| Partner report                                                      | 5 | .72 | How often does your partner seem to be having problems managing your child in general?                     |
| Fathers' poor discipline, child age 7 years<br>( <i>N</i> = 218):   |   |     |                                                                                                            |
| Harsh Discipline:                                                   |   |     |                                                                                                            |
| Self-report                                                         | 6 | .61 | How often do you scold or yell at child when child won't mind you or breaks a rule?                        |
| Partner report                                                      | 6 | .76 | How often do you think the discipline your partner uses with your child is harsh or mean?                  |
| Poor discipline implementation:                                     |   |     |                                                                                                            |
| Self-report                                                         | 7 | .58 | How often do you think that the kind of punishment you give your child depends on your mood?               |
| Partner report                                                      | 7 | .72 | When your child won't mind you or breaks a rule, how often does your partner leave it to the other parent? |
| Low confidence in discipline:                                       |   |     |                                                                                                            |
| Self-report                                                         | 5 | .64 | How often when you discipline your child, does s/he ignore the punishment?                                 |
| Partner report                                                      | 5 | .77 | How often do you think your partner is satisfied?                                                          |
| Mothers' poor discipline, child ages 11-12 years ( <i>N</i> = 170): |   |     |                                                                                                            |
| Harsh discipline:                                                   |   |     |                                                                                                            |
| Self-report                                                         | 6 | .57 | How often do you think your discipline is too strict?                                                      |
| Partner report                                                      | 6 | .50 | How often does your partner spank or swat your child when your child won't mind or breaks a rule?          |

|                                                                 |   |     |  |                                                                                                            |
|-----------------------------------------------------------------|---|-----|--|------------------------------------------------------------------------------------------------------------|
| Poor discipline implementation:                                 |   |     |  |                                                                                                            |
| Self-report                                                     | 7 | .67 |  | How often do you let your child get out of a punishment when s/he really sets his/her mind to it?          |
| Partner report                                                  | 7 | .75 |  | How often does your partner get angry when disciplining your child?                                        |
| Low confidence in discipline:                                   |   |     |  |                                                                                                            |
| Self-report                                                     | 5 | .77 |  | How much of the time do you feel confident that you can change or correct your child's misbehavior?        |
| Partner report                                                  | 5 | .76 |  | How often does your partner seem to be having problems managing your child in general?                     |
| <hr/>                                                           |   |     |  |                                                                                                            |
| Fathers' poor discipline, child ages 11-12 years ( $N = 149$ ): |   |     |  |                                                                                                            |
| Harsh Discipline:                                               |   |     |  |                                                                                                            |
| Self-report                                                     | 6 | .50 |  | How often do you do you scold or yell at child when child won't mind you or breaks a rule?                 |
| Partner report                                                  | 6 | .78 |  | How often do you think the discipline your partner uses with your child is harsh or mean?                  |
| Poor discipline implementation:                                 |   |     |  |                                                                                                            |
| Self-report                                                     | 7 | .66 |  | How often do you think that the kind of punishment you give your child depends on your mood?               |
| Partner report                                                  | 7 | .69 |  | When your child won't mind you or breaks a rule, how often does your partner leave it to the other parent? |
| Low confidence in discipline:                                   |   |     |  |                                                                                                            |
| Self-report                                                     | 5 | .73 |  | How often when you discipline your child, does s/he ignore the punishment?                                 |
| Partner report                                                  | 5 | .77 |  | How often do you think your partner is satisfied?                                                          |
| <hr/>                                                           |   |     |  |                                                                                                            |
| Mothers' poor discipline, child ages 13-14 years ( $N = 140$ ): |   |     |  |                                                                                                            |
| Harsh discipline:                                               |   |     |  |                                                                                                            |
| Self-report                                                     | 6 | .56 |  | How often do you think your discipline is too strict?                                                      |
| Partner report                                                  | 6 | .41 |  | How often does your partner spank or swat your child when your child won't mind or breaks a rule?          |
| Poor discipline implementation:                                 |   |     |  |                                                                                                            |
| Self-report                                                     | 7 | .71 |  | How often do you let your child get out of a punishment when s/he really sets his/her mind to it?          |
| Partner report                                                  | 7 | .77 |  | How often does your partner get angry when disciplining your child?                                        |

|                                                                 |   |     |                                                                                                            |
|-----------------------------------------------------------------|---|-----|------------------------------------------------------------------------------------------------------------|
| Low confidence in discipline:                                   |   |     |                                                                                                            |
| Self-report                                                     | 5 | .76 | How much of the time do you feel confident that you can change or correct your child's misbehavior?        |
| Partner report                                                  | 5 | .71 | How often does your partner seem to be having problems managing your child in general?                     |
| <hr/>                                                           |   |     |                                                                                                            |
| Fathers' poor discipline, child ages 13-14 years ( $N = 117$ ): |   |     |                                                                                                            |
| Harsh Discipline:                                               |   |     |                                                                                                            |
| Self-report                                                     | 6 | .59 | How often do you do you scold or yell at child when child won't mind you or breaks a rule?                 |
| Partner report                                                  | 6 | .68 | How often do you think the discipline your partner uses with your child is harsh or mean?                  |
| Poor discipline implementation:                                 |   |     |                                                                                                            |
| Self-report                                                     | 7 | .71 | How often do you think that the kind of punishment you give your child depends on your mood?               |
| Partner report                                                  | 7 | .70 | When your child won't mind you or breaks a rule, how often does your partner leave it to the other parent? |
| Low confidence in discipline:                                   |   |     |                                                                                                            |
| Self-report                                                     | 5 | .72 | How often when you discipline your child, does s/he ignore the punishment?                                 |
| Partner report                                                  | 5 | .76 | How often do you think your partner is satisfied?                                                          |

*Note:* For the sample sizes listed above, availability of self- and partner reports of mothers' discipline ranged from 92.9% to 100% and 62.1% to 75.8% of the cases across assessments, respectively; for fathers' discipline availability of self- and partner reports ranged from 92.8% to 100% and 79.5% to 92.0% of the cases across assessments, respectively.



Table 3a. Measures of Mothers' and Fathers' Positive Parenting Comprised of Two Subscales: Pleasure in Parenting and Positive Responsiveness to Child Behaviors (at child age 3 years), and Positive Parent-Child Relationship and Parental Monitoring of Child (at child ages 5 to 13-14 years)

| Construct                                                                                    | # items | $\alpha$ | Sample item                                                                                               |
|----------------------------------------------------------------------------------------------|---------|----------|-----------------------------------------------------------------------------------------------------------|
| Mothers' positive parenting, child age 3 years<br>( <i>N</i> = 278):                         |         |          |                                                                                                           |
| Pleasure in parenting:                                                                       |         |          |                                                                                                           |
| Child Rearing Practices Report (Block, 1965) (mother report)                                 | 10      | .76      | We are trying to find out how parents feel about various child-rearing tasks (e.g., help with toileting). |
| Positive responsiveness:                                                                     |         |          |                                                                                                           |
| Parent Daily Report (Chamberlain & Reid, 1987) (mother report)                               | 23      | n/a      | % of positive responses to various child behaviors (e.g., child mind/listen when told to do something).   |
| Experimenter Impressions Inventory (Pears & Ayres, 2000) (observer report)                   | 8       | .87      | How often was parent responsive to the child?                                                             |
| Coder Ratings for Clean-up Task (Pears & Ayres, 2000) (observer report)                      | 8       | .57      | How often did parent laugh or joke with child?                                                            |
| Fathers' positive parenting, child age 3 years<br>( <i>N</i> = 248):                         |         |          |                                                                                                           |
| Pleasure in parenting:                                                                       |         |          |                                                                                                           |
| Child Rearing Practices Report (Block, 1965) (father report)                                 | 10      | .80      | We are trying to find out how parents feel about various child-rearing tasks (e.g., playing with child).  |
| Positive responsiveness:                                                                     |         |          |                                                                                                           |
| Parent Daily Report (Chamberlain & Reid, 1987) (father report)                               | 23      | n/a      | % of positive responses to various child behaviors (e.g., child mind/listen when told to do something).   |
| Experimenter Ratings Inventory (Pears & Ayres, 2000) (observer report)                       | 8       | .88      | Parent seemed to watch child with enjoyment.                                                              |
| Coder Ratings for Clean-up Task (Pears & Ayres, 2000) (observer report)                      | 8       | .57      | Parent was physically affectionate with child.                                                            |
| Mother positive parenting, child age 5 years<br>( <i>N</i> = 267):                           |         |          |                                                                                                           |
| Positive mother-child relationship:                                                          |         |          |                                                                                                           |
| Monitor and Parent-Child Relationship Questionnaire (Capaldi & Wilson, 1998) (mother report) | 5       | .77      | I get along well with my child.                                                                           |
| Composite of observer ratings:                                                               |         |          |                                                                                                           |
| Play Task Experimenter Ratings (Pears & Ayres, 2000) (observer report)                       | 3       | .64      | How often did parent and child play or talk together?                                                     |
| Cognitive Task Experimenter Ratings (Fagot & Gauvain,                                        | 6       | .88      | Was the parent sensitive to the child's needs?                                                            |

|                                                                                              |   |     |                                                                                |
|----------------------------------------------------------------------------------------------|---|-----|--------------------------------------------------------------------------------|
| 1997) (observer report)                                                                      |   |     |                                                                                |
| Communication Task Experimenter Impressions (Pears & Ayres, 2000) (observer report)          | 3 | .76 | How well did the parent and child get along?                                   |
| Mothers' monitoring of child:                                                                |   |     |                                                                                |
| Monitor and Parent-Child Relationship Questionnaire (Capaldi & Wilson, 1998) (mother report) | 1 | n/a | How well do you keep track of your child?                                      |
| Parent Interview (Capaldi, Pears, Wilson, & Bruckner, 1998) (mother report)                  | 3 | .73 | How often do you limit or control which TV shows or movies your child watches? |
| <hr/>                                                                                        |   |     |                                                                                |
| Fathers' positive parenting, child age 5 years<br>( <i>N</i> = 236):                         |   |     |                                                                                |
| Positive father-child relationship:                                                          |   |     |                                                                                |
| Monitor and Parent-Child Relationship Questionnaire (Capaldi & Wilson, 1998) (father report) | 5 | .72 | I get along well with my child.                                                |
| Composite of observer ratings:                                                               |   |     |                                                                                |
| Play Task Experimenter Ratings (Pears & Ayres, 2000) (observer report)                       | 3 | .69 | How well did the parent and child get along?                                   |
| Cognitive Task Experimenter Ratings (Fagot & Gauvain, 1997) (observer report)                | 6 | .91 | Was the parent supportive of the child's efforts?                              |
| Communication Task Experimenter Rating (Pears & Ayres, 2000) (observer report)               | 3 | .85 | How sensitive was the parent?                                                  |
| Fathers' monitoring of child:                                                                |   |     |                                                                                |
| Monitor and Parent-Child Relationship Questionnaire (Capaldi & Wilson, 1998) (father report) | 1 | n/a | How well do you keep track of your child?                                      |
| Parent Interview (Capaldi, Pears, Wilson, & Bruckner, 1998) (father report)                  | 3 | .85 | How often do you limit or control which TV shows or movies your child watches? |
| <hr/>                                                                                        |   |     |                                                                                |
| Mothers' positive parenting, child age 7 years<br>( <i>N</i> = 229):                         |   |     |                                                                                |
| Positive mother-child relationship:                                                          |   |     |                                                                                |
| Monitor and Parent-Child Relationship Questionnaire (Capaldi & Wilson, 1998) (mother report) | 5 | .76 | It has been a pleasure to raise my child.                                      |
| Composite of observer ratings:                                                               |   |     |                                                                                |
| Social teaching task impressions (Fagot, 1998) (observer report)                             | 5 | .75 | How often did parent praise the child's efforts?                               |
| Discussion Task Ratings (OSLC, 1985) (observer report)                                       | 4 | .89 | During parent issue, child seemed to get along well with parent?               |
| Play Task Experimenter Ratings (Pears & Ayres, 2000) (observer report)                       | 3 | .74 | How often did parent and child play or talk together?                          |
| Parent Interviewer Ratings (Capaldi & Wilson, 1994) (observer report)                        | 4 | .89 | Parent seemed generally accepting of the child.                                |

|                                                                                              |   |     |                                                                                |
|----------------------------------------------------------------------------------------------|---|-----|--------------------------------------------------------------------------------|
| Mothers' monitoring of child:                                                                |   |     |                                                                                |
| Monitor and Parent-Child Relationship Questionnaire (Capaldi & Wilson, 1998) (mother report) | 1 | n/a | How well do you keep track of your child?                                      |
| Parent Interview (Capaldi, Pears, Wilson, & Bruckner, 1998) (mother report)                  | 3 | .78 | How often do you limit or control which TV shows or movies your child watches? |
| Parent Interviewer Impressions (Capaldi & Wilson, 1994) (observer report)                    | 1 | n/a | This parent seemed to monitor the child carefully.                             |
| <hr/>                                                                                        |   |     |                                                                                |
| Fathers' positive parenting, child age 7 years (N = 206):                                    |   |     |                                                                                |
| Positive father-child relationship:                                                          |   |     |                                                                                |
| Monitor and Parent-Child Relationship Questionnaire (Capaldi & Wilson, 1998) (father report) | 5 | .74 | It has been a pleasure to raise my child.                                      |
| Composite of observer ratings:                                                               |   |     |                                                                                |
| Social teaching task impressions (Fagot, 1998) (observer report)                             | 5 | .61 | How often did parent praise the child's efforts?                               |
| Discussion Task Impressions (OSLC, 1985) (observer report)                                   | 4 | .87 | During parent issue, child seemed to get along well with parent?               |
| Play Task Experimenter Impressions (Pears & Ayres, 2000) (observer report)                   | 3 | .63 | How often did parent and child play or talk together?                          |
| Parent Interviewer Impressions (Capaldi & Wilson, 1994) (observer report)                    | 4 | .86 | Parent seemed generally accepting of the child.                                |
| Fathers' monitoring of child:                                                                |   |     |                                                                                |
| Monitor and Parent-Child Relationship Questionnaire (Capaldi & Wilson, 1998) (father report) | 1 | n/a | How well do you keep track of your child?                                      |
| Parent Interview (Capaldi, Pears, Wilson, & Bruckner, 1998) (father report)                  | 6 | .70 | How hard is it to keep track of the child when they are not home?              |
| Parent Interviewer Impressions (Capaldi & Wilson, 1994) (observer report)                    | 1 | n/a | This parent seemed to monitor the child carefully.                             |
| <hr/>                                                                                        |   |     |                                                                                |
| Mothers' positive parenting, child ages 11-12 years (N = 168):                               |   |     |                                                                                |
| Positive mother-child relationship:                                                          |   |     |                                                                                |
| Monitor and Parent-Child Relationship Questionnaire (Capaldi & Wilson, 1998) (mother report) | 5 | .77 | It has been a pleasure to raise my child.                                      |
| Composite of observer ratings:                                                               |   |     |                                                                                |
| Social teaching task impressions (Fagot, 1998) (observer report)                             | 5 | .70 | How often did parent praise the child's efforts?                               |
| Discussion Task Ratings (OSLC, 1985) (observer report)                                       | 4 | .87 | During parent issue, child seemed to get along well with parent?               |
| Homework Task Ratings (Knutson & Forgatch, 1990)                                             | 5 | .82 |                                                                                |

|                                                                                              |   |     |                                                                                |
|----------------------------------------------------------------------------------------------|---|-----|--------------------------------------------------------------------------------|
| (observer report)                                                                            |   |     |                                                                                |
| Parent-child Fun Task Experimenter Impressions (Pears & Ayres, 2000) (observer report)       | 5 | .87 | How often did parent and child play or talk together?                          |
| Parent Interviewer Impressions (Capaldi & Wilson, 1994) (observer report)                    | 4 | .83 | Parent seemed generally accepting of the child.                                |
| Mothers' monitoring of child:                                                                |   |     |                                                                                |
| Monitor and Parent-Child Relationship Questionnaire (Capaldi & Wilson, 1998) (mother report) | 1 | n/a | How well do you keep track of your child?                                      |
| Parent Interview (Capaldi, Pears, Wilson, & Bruckner, 1998) (mother report)                  | 3 | .78 | How often do you limit or control which TV shows or movies your child watches? |
| Parent Interviewer Ratings (Capaldi & Wilson, 1994) (observer report)                        | 1 | n/a | This parent seemed to monitor the child carefully.                             |
| <hr/>                                                                                        |   |     |                                                                                |
| Fathers' positive parenting, child ages 11-12 years ( $N = 143$ ):                           |   |     |                                                                                |
| Positive father-child relationship:                                                          |   |     |                                                                                |
| Monitor and Parent-Child Relationship Questionnaire (Capaldi & Wilson, 1998) (father report) | 5 | .83 | It has been a pleasure to raise my child.                                      |
| Composite of observer ratings:                                                               |   |     |                                                                                |
| Social teaching task impressions (Fagot, 1998) (observer report)                             | 5 | .67 | How often did parent praise the child's efforts?                               |
| Discussion Task Ratings (OSLC, 1985) (observer report)                                       | 4 | .87 | During parent issue, child seemed to get along well with parent?               |
| Homework Task Ratings (Knutson & Forgatch, 1990) (observer report)                           | 5 | .74 |                                                                                |
| Parent-child Fun Task Experimenter Impressions (Pears & Ayres, 2000) (observer report)       |   |     |                                                                                |
| Parent Interviewer Impressions (Capaldi & Wilson, 1994) (observer report)                    | 4 | .79 | Parent seemed generally accepting of the child.                                |
| Fathers' monitoring of child:                                                                |   |     |                                                                                |
| Monitor and Parent-Child Relationship Questionnaire (Capaldi & Wilson, 1998) (father report) | 1 | n/a | How well do you keep track of your child?                                      |
| Parent Interview (Capaldi, Pears, Wilson, & Bruckner, 1998) (father report)                  | 4 | .77 | How often do you limit or control which TV shows or movies your child watches? |
| Parent Interviewer (Capaldi & Wilson, 1994) Impressions (observer report)                    | 1 | n/a | This parent seemed to monitor the child carefully.                             |
| <hr/>                                                                                        |   |     |                                                                                |
| Mothers' positive parenting, child ages 13-14 years ( $N = 147$ ):                           |   |     |                                                                                |
| Positive mother-child relationship:                                                          |   |     |                                                                                |
| Monitor and Parent-Child Relationship Questionnaire (Capaldi & Wilson, 1998) (mother report) | 5 | .83 | It has been a pleasure to raise my child.                                      |

|                                                                                                 |   |     |                                                                                                                          |
|-------------------------------------------------------------------------------------------------|---|-----|--------------------------------------------------------------------------------------------------------------------------|
| Composite of observer ratings:                                                                  | 3 | .67 |                                                                                                                          |
| Social Teaching Task Impressions (Fagot, 1998)<br>(observer report)                             | 4 | .74 | How often did parent praise the child's efforts?                                                                         |
| Child Interviewer Impressions (Capaldi, Pears, Wilson,<br>& Bruckner, 2001) (observer report)   | 1 | n/a | During the child interview, this child seemed to get along well<br>with and generally have good feelings toward mother.  |
| Parent Interviewer Impressions (Capaldi & Wilson,<br>1994) (observer report)                    | 4 | .86 | Parent seemed generally accepting of the child.                                                                          |
| Mothers' monitoring of child:                                                                   |   |     |                                                                                                                          |
| Monitor and Parent-Child Relationship Questionnaire<br>(Capaldi & Wilson, 1998) (mother report) | 1 | n/a | How well do you keep track of your child?                                                                                |
| Parent Interview (Capaldi, Pears, Wilson, & Bruckner,<br>1998) (mother report)                  | 4 | .78 | When your child accesses the internet, how often do you know<br>what s/he is doing and /or what sites s/he is accessing? |
| Parent Interviewer (Capaldi & Wilson, 1994) Impressions<br>(observer report)                    | 1 | n/a | This parent seemed to monitor the child carefully.                                                                       |
| <hr/>                                                                                           |   |     |                                                                                                                          |
| Fathers' positive parenting, child ages 13-14 years ( $N = 147$ ):                              |   |     |                                                                                                                          |
| Positive father-child relationship:                                                             |   |     |                                                                                                                          |
| Monitor and Parent-Child Relationship Questionnaire<br>(Capaldi & Wilson, 1998) (father report) | 5 | .81 | It has been a pleasure to raise my child.                                                                                |
| Composite of observer ratings:                                                                  |   |     |                                                                                                                          |
| Social Teaching Task Impressions (Fagot, 1998)<br>(observer report)                             | 4 | .69 | How often did parent praise the child's efforts?                                                                         |
| Child Interviewer Impressions (Capaldi, Pears, Wilson,<br>& Bruckner, 2001) (observer report)   | 1 | n/a | During the child interview, this child seemed to get along well<br>with and generally have good feelings toward father.  |
| Parent Interviewer Impressions (Capaldi & Wilson,<br>1994) (observer report)                    | 4 | .66 | Parent seemed generally accepting of the child.                                                                          |
| Fathers' monitoring of child:                                                                   |   |     |                                                                                                                          |
| Monitor and Parent-Child Relationship Questionnaire<br>(Capaldi & Wilson, 1998) (father report) | 1 | n/a | How well do you keep track of your child?                                                                                |
| Parent Interview (Capaldi, Pears, Wilson, & Bruckner,<br>1998) (father report)                  | 4 | .76 | When your child accesses the internet, how often do you know<br>what s/he is doing and /or what sites s/he is accessing? |
| Parent Interviewer Impressions (Capaldi & Wilson, 1994)<br>(observer report)                    | 1 | n/a | This parent seemed to monitor the child carefully.                                                                       |

*Note:* For the sample sizes listed above, availability of self- and observer reports of mothers' positive parenting ranged from 90.5% to 100% and 74.8% to 100% of the cases across assessments, respectively; for fathers' positive parenting availability of self- and observer reports ranged from 75.5% to 100% and 74.2% to 100% of the cases across assessments, respectively.
